# Supplementary material for: Simulator training in focus assessed transthoracic echocardiography (FATE) for undergraduate medical students: results from the FateSim randomized controlled trial
Source: PubMed Central journal article supplement (PMC11699650; doi:10.1186/s12909-024-06564-y), 2025-01-04
Supplement: 12909_2024_6564_MOESM1_ESM.pdf [file 12909_2024_6564_MOESM1_ESM.pdf]

**Supplement 1.** Learning objectives in the course model developed and adapted from Greim et al. and Weimer et al.

---

| Topic                                                              | Learning objectives: upon completing this course, the participant will be able to:                                                                                                                                                                                                                                                                                                                                                                                                         |
|--------------------------------------------------------------------|--------------------------------------------------------------------------------------------------------------------------------------------------------------------------------------------------------------------------------------------------------------------------------------------------------------------------------------------------------------------------------------------------------------------------------------------------------------------------------------------|
| Basic anatomy and physiology                                       | <ul style="list-style-type: none"><li>✓ Describe anatomic relationships in the chest</li><li>✓ Show the exact position of the heart and the positional relationship of the chambers to each other</li><li>✓ Explain the physiology of blood flow and valve mechanics during systole and diastole</li><li>✓ Explain the physiology of blood flow and valve mechanics during systole and diastole</li><li>✓ Explain the movement of the diaphragm during inhalation and exhalation</li></ul> |
| Physical principles, choice of transducer, and instrument settings | <ul style="list-style-type: none"><li>✓ Explain the physical principles of image acquisition and ultrasound diagnosis</li><li>✓ Explain the differences between the various transducers and justify the choice of transducer</li><li>✓ Explain how penetration depth, image resolution, and frequency relate to each other</li></ul>                                                                                                                                                       |
| Patient positioning and transducer movement                        | <ul style="list-style-type: none"><li>✓ Carry out positioning variations and explain how positioning improves the ultrasound conditions</li><li>✓ Understand and implement defined movement sequences (tilting, angulating, rotating, shifting, swiveling) in relation to image morphology</li></ul>                                                                                                                                                                                       |
| Examination                                                        | <ul style="list-style-type: none"><li>✓ Adjust the defined standard sections and explain the plane</li><li>✓ List relevant questions that can be answered by setting the respective plane</li><li>✓ Describe the possible transducer movements and adjustable settings available to optimize the planes</li></ul>                                                                                                                                                                          |

## Pathologies

- ✓ Identify the most common pathologies in in the standard sections: Hyper- and hypovolemia, dilated cardiomyopathy, right heart strain, pericardial effusion/tamponade, mitral valve insufficiency, aortic valve stenosis, left heart hypertrophy, myxoma, thrombus, infarction, pulmonary hypertension, reduced left ventricular pump function, pleural effusion
-
