# Supplementary material for: Simulator training in focus assessed transthoracic echocardiography (FATE) for undergraduate medical students: results from the FateSim randomized controlled trial
Source: PubMed Central journal article supplement (PMC11699650; doi:10.1186/s12909-024-06564-y), 2025-01-04
Supplement: 12909_2024_6564_MOESM3_ESM.pdf [file 12909_2024_6564_MOESM3_ESM.pdf]

# Station 1: Introduction to the devices + parasternal long axis view + parasternal short axis view

| <input checked="" type="checkbox"/> Scanning guide                                                                                                                                           | Tip for the examiners                                                                                                                                                                                                                                                                                                                                                                                                                                                                                                                                                                                                                                                                                                                                              |
|----------------------------------------------------------------------------------------------------------------------------------------------------------------------------------------------|--------------------------------------------------------------------------------------------------------------------------------------------------------------------------------------------------------------------------------------------------------------------------------------------------------------------------------------------------------------------------------------------------------------------------------------------------------------------------------------------------------------------------------------------------------------------------------------------------------------------------------------------------------------------------------------------------------------------------------------------------------------------|
| <input type="checkbox"/> <b>TN 1</b> Obtain the parasternal long axis view of the heart                                                                                                      | <p><i>Normal patient</i></p> 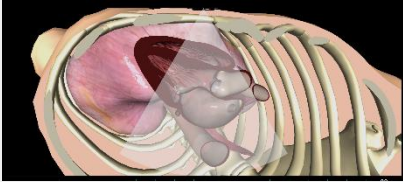 <p>Source:CAE GmbH</p>  <p>Source:Philips GmbH Market DACH</p> <ol style="list-style-type: none"> <li>1. <i>Layout</i> ⇨ <i>AR Only</i></li> <li>2. After the image has been acquired: <i>Beam</i> ⇨ <i>guide</i> (Describe image orientation)</li> <li>3. After the image has been acquired: <i>Layout</i> ⇨ <i>split view</i></li> </ol>  <p>Source:CAE GmbH</p>  <p>Source:CAE GmbH</p> |
| <input type="checkbox"/> <b>TN 2</b> Obtain the parasternal long axis view of the heart, pay attention to adequate image optimization                                                        | <p><i>Normal patient, name the buttons on the device</i></p> <div style="display: flex; flex-wrap: wrap;"> <div style="width: 50%;"> <p><i>Depth</i></p>  </div> <div style="width: 50%;"> <p><i>Gain</i></p>  </div> <div style="width: 50%;"> <p><i>Beam wide</i></p>  </div> </div> <p style="text-align: right;">Source:CAE GmbH</p>                                                                                                                                                                |
| <input type="checkbox"/> <b>TN 3</b> Obtain the parasternal long axis view of the heart, pay attention to transducer manipulation and name the anatomical structures                         | <p><i>Normal patient</i></p> <ol style="list-style-type: none"> <li>1. <i>Beam</i> ⇨ <i>Ultrasound</i><br/>Name the anatomical structures (landmarks and quality features)</li> <li>2. <i>Beam</i> ⇨ <i>Guide</i> to explanation of probe orientation</li> </ol>  <p>Source:CAE GmbH</p>                                                                                                                                                                                                                                                                                                                                                                                       |
| <input type="checkbox"/> <b>TN 4</b> Obtain the parasternal long axis view of the heart, pay attention to transducer manipulation, image optimization and name the anatomical structures (1) | <p><b>Pathology: dilated cardiomyopathy – very severe left ventricular systolic dysfunction</b></p> <ol style="list-style-type: none"> <li>1. Name the pathologic findings, noncontractile left ventricle, systolic dysfunction</li> <li>2. Rotate the transducer to the short axis view of the heart: pay attention to image optimization<br/><i>Beam</i> ⇨ <i>Guide</i> to orientation explanation</li> </ol> <p>Rotate the transducer to the parasternal short axis view and pay attention to image optimization (2)</p>                                                                                                                                                                                                                                        |

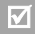

## Scanning guide

## Tip for the examiners

Describe the pathologic findings (3)

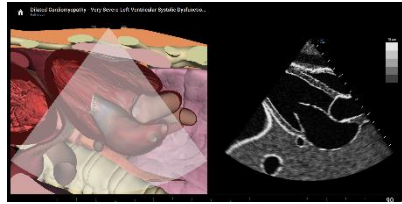

Source: CAE GmbH

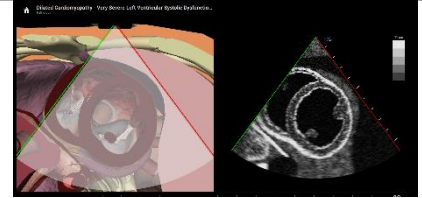

Source: CAE GmbH

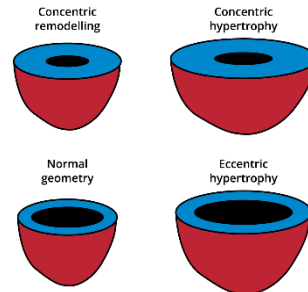

3. Describe the pathologic findings: Systolic dysfunction at the level of the papillary muscles (eye balling), the ventricle contracts barely.

Tip: Place the mouse pointer in the middle of the ventricle

- TN** Starting from the parasternal long axis view, obtain the parasternal short axis view of the heart

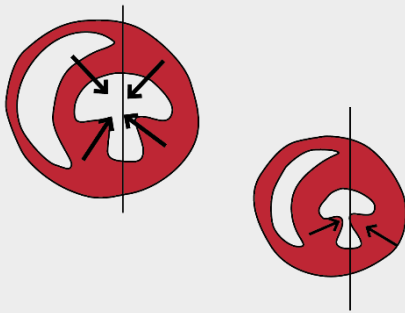

*Normal patient*

1. Explain the normal systolic function

Tip: Place the mouse pointer in the middle of the ventricle

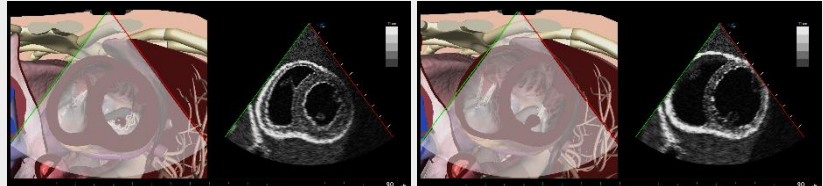

Source: CAE GmbH

2. *Beam* ⇔ *Ultrasound*

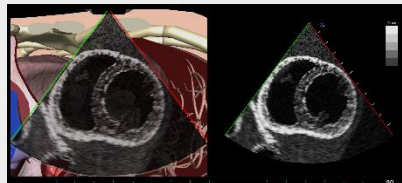

Source: CAE GmbH

3. Explain the transducer movements (Tilting, Rocking, Rotating, Sliding)

- TN** Starting from the parasternal long axis view, obtain the parasternal short axis view of the heart. Pay attention to transducer manipulation, image optimization and name the anatomical structures

*Normal patient*

1. Remain on the same scan plane as before

2. After obtaining the scan plane, change to *Layout* ⇔ *AR Only* + *Beam* ⇔ *Transparent*

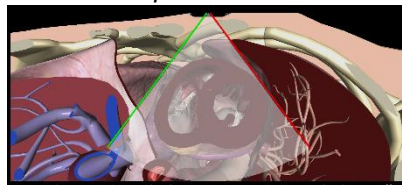

Source: CAE GmbH

- TN** Starting from the parasternal long axis view, obtain the parasternal short axis view of the heart (AR only) (1)

Name the anatomical structures (large US) (2)

*Normal patient*

1. Remain on AR only

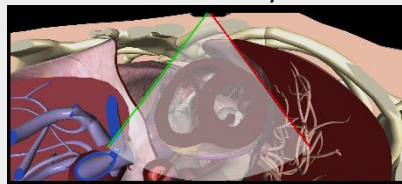

Source: CAE GmbH

2. After obtaining the scan plane correctly: *Layout* ⇔ *Large US*

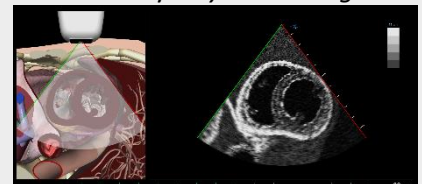

Source: CAE GmbH

| ☑      | Scanning guide                                                                                                                                           | Tip for the examiners                                                                                                                                                                                                                                                                        |
|--------|----------------------------------------------------------------------------------------------------------------------------------------------------------|----------------------------------------------------------------------------------------------------------------------------------------------------------------------------------------------------------------------------------------------------------------------------------------------|
|        |                                                                                                                                                          | 3. Mention the level of the aortic valve, mitral valve and apex of the heart (do not need to be obtained)                                                                                                                                                                                    |
| ☐ TN 4 | <p>Starting from the parasternal long axis view, obtain the parasternal short axis view of the heart (1)</p> <p>Describe the pathologic findings (2)</p> | <p><b>Pathology: pulmonary hypertension</b></p> <p>1. Description of the D-Sign in right ventricular strain, the interventricular septum is pressed towards the left ventricle</p> 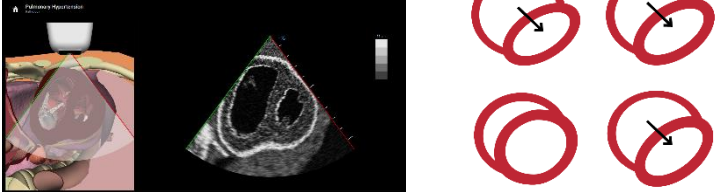 <p>Source:CAE GmbH</p> |

## Station 2: Apical 4-chamber view + Left flank view + Right flank view

| ☑      | Scanning guide                                                                                                                                                                                               | Tip for the examiners                                                                                                                                                                                                                                                                                                                                                                                                                                          |
|--------|--------------------------------------------------------------------------------------------------------------------------------------------------------------------------------------------------------------|----------------------------------------------------------------------------------------------------------------------------------------------------------------------------------------------------------------------------------------------------------------------------------------------------------------------------------------------------------------------------------------------------------------------------------------------------------------|
| ☐ TN 1 | <p>Obtain the apical 4-chamber view of the heart</p> 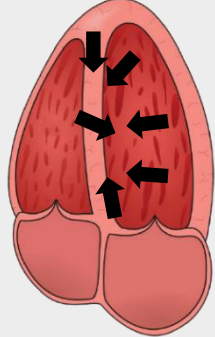 <p>Source:Philips GmbH Market DACH</p>                               | <p><b>Normal patient</b></p> <p>1. Layout ⇔ AR only</p>  <p>Source:CAE GmbH</p> <p>2. Explain: Position at 3 o'clock, sliding of the transducer, quality features of the scan plane</p> <p>3. After obtaining the scan plane correctly: Layout ⇔ split view</p>  <p>Source:CAE GmbH</p> |
| ☐ TN 2 | <p>Obtain the apical 4-chamber view of the heart, pay attention to transducer manipulation, image optimization and name the anatomical structures (1)</p> <p>Show the origins of the pulmonary veins (2)</p> | <p><b>Normal patient</b></p> <p>1. Layout ⇔ split view</p>  <p>Source:CAE GmbH</p> <p>2. Once again explain the anatomical structures, ultrasound tips and tricks, transducer manipulation</p> <p>3. Watch how the ventricle contracts during systole (all parts of the wall are pulled towards the middle of the heart)</p>                                               |
| ☐ TN 3 | <p>Obtain the apical 4-chamber view of the heart (1)</p> <p>Describe the pathologic findings (2)</p>                                                                                                         | <p><b>Pathology: severe biventricular dysfunction, case 10</b></p> <p>1. Pay attention to the wall of the heart, show the global systolic dysfunction</p>  <p>Source:CAE GmbH</p>                                                                                                                                                                                          |

| ☑      | Scanning guide                                                                                                                                                                                        | Tip for the examiners                                                                                                                                                                                                                                                                                                                                                                         |                                                                                                                                                                                                                                                                                                                       |
|--------|-------------------------------------------------------------------------------------------------------------------------------------------------------------------------------------------------------|-----------------------------------------------------------------------------------------------------------------------------------------------------------------------------------------------------------------------------------------------------------------------------------------------------------------------------------------------------------------------------------------------|-----------------------------------------------------------------------------------------------------------------------------------------------------------------------------------------------------------------------------------------------------------------------------------------------------------------------|
| ☐ TN 4 | <p>Obtain the apical 4-chamber view of the heart, pay attention to transducer manipulation, image optimization and name the anatomical structures (1)</p> <p>Describe the pathologic findings (2)</p> | <p><b>Pathology: left ventricular apical aneurysm with thrombus</b></p> <ol style="list-style-type: none"> <li>1. Place the transducer as caudally as possible, in order to identify the thrombus</li> <li>2. Explain the pathologic findings: No contraction seen at the apex of the heart, contraction can be seen every now and then towards the mitral valve</li> </ol>                   | 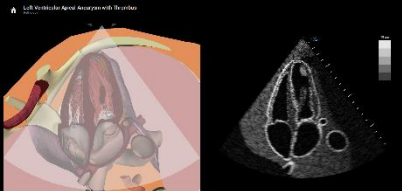 <p>Source:CAE GmbH</p>                                                                                                                                                                                                            |
| ☐ TN 1 | <p>Obtain the right and left flank view, pay attention to transducer manipulation and image optimization</p>                                                                                          | <p><i>Normal patient</i></p> <ol style="list-style-type: none"> <li>1. <i>Layout</i> ⇒ Obtain an image of the lungs (in case it has been switched off previously)</li> <li>2. <i>Layout</i> ⇒ split view</li> </ol>  <p>Source:CAE GmbH</p>                                                                 | <ol style="list-style-type: none"> <li>3. Image optimization and explanation of the anatomical structures</li> <li>4. Display the other side: <i>Beam</i> ⇒ Guide to orientation cranial/caudal</li> </ol>  <p>Source:CAE GmbH</p> |
| ☐ TN 2 | <p>Obtain the right and left flank view, pay attention to transducer manipulation and image optimization and explain the anatomical structures</p>                                                    | <p><i>Normal patient</i></p> <ol style="list-style-type: none"> <li>1. Left flank <i>Beam</i> ⇒ <i>Ultrasound</i></li> </ol>  <p>Source:CAE GmbH</p> <ol style="list-style-type: none"> <li>2. Explain the anatomical structures</li> </ol>                                                               |                                                                                                                                                                                                                                                                                                                       |
| ☐ TN 3 | <p>Obtain the right (1) and left (2) flank view, pay attention to transducer manipulation and image optimization.</p> <p>Describe the pathologic findings (3)</p>                                     | <p><b>Pathology: left pleural effusion case 09</b></p> <ol style="list-style-type: none"> <li>1. Explain the pathogenesis, hypoechoic effusion</li> <li>2. Ultrasound tip: Rotate the transducer between the ribs (scan through the intercostal space), move ventrally</li> </ol>  <p>Source:CAE GmbH</p> |                                                                                                                                                                                                                                  |
| ☐ TN 4 | <p>Obtain the right (1) and left (2) flank view, pay attention to transducer manipulation and image optimization.</p> <p>Describe the pathologic findings (3)</p>                                     | <p><b>Pathology: right pleural effusion</b></p> <ol style="list-style-type: none"> <li>1. See instructions above</li> </ol>  <p>Source:CAE GmbH</p>                                                                                                                                                       |                                                                                                                                                                                                                                  |

# Station 3: Subxiphoid cardiac view + complete examination according to FATE-

## Protocol

| ☑      | Scanning guide                                                                                                                                                                                               | Tip for the examiners                                                                                                                                                                                                                                                        |                                                                                                                                                                                                                                                                                                         |
|--------|--------------------------------------------------------------------------------------------------------------------------------------------------------------------------------------------------------------|------------------------------------------------------------------------------------------------------------------------------------------------------------------------------------------------------------------------------------------------------------------------------|---------------------------------------------------------------------------------------------------------------------------------------------------------------------------------------------------------------------------------------------------------------------------------------------------------|
| ☐ TN 1 | Obtain the subxiphoid long axis view of the heart                                                                                                                                                            | <p><i>Normal patient</i></p> <p>Pay attention to coupling! Hold the transducer at the base (3 finger grip)</p> <p>1. <i>Layout</i> ⇨ <i>split view</i></p> 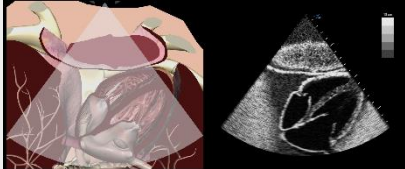 <p>Soure:CAE GmbH</p>          | <p>2. After obtaining the scan plane correctly: <i>Beam</i> ⇨ <i>Guide zur Orientation</i></p>  <p>Soure:CAE GmbH</p> <p>3. Explain the anatomical structures (landmarks and quality features of the scan plane)</p> |
| ☐ TN 2 | Obtain the subxiphoid long axis view of the heart, pay attention to transducer manipulation and image optimization and name the anatomical structures                                                        | <p><i>Normal patient</i></p> <p>1. Remain on the previous scan plane</p> <p>2. After obtaining the scan plane correctly: <i>Layout</i> ⇨ <i>AR only</i></p>  <p>Soure:CAE GmbH</p>        |                                                                                                                                                                                                                                                                                                         |
| ☐ TN 3 | <p>Obtain the subxiphoid long axis view of the heart, pay attention to transducer manipulation and image optimization and name the anatomical structures (1)</p> <p>Describe the pathologic findings (2)</p> | <p><b>Pathology: tamponade</b></p> <p>1. <i>Layout</i> ⇨ <i>Large US</i></p>  <p>Soure:CAE GmbH</p>  | <p>2. Explain the pathologic findings (hypoechoic fluid, Swinging heart due to lack of space)</p>  <p>Soure:CAE GmbH</p>      |
| ☐ TN 4 | <p>Obtain the subxiphoid long axis view of the heart, pay attention to transducer manipulation and image optimization and name the anatomical structures (1)</p> <p>Describe the pathologic findings (2)</p> | <p><b>Pathology: myxoma</b></p> <p>1. Explain the pathologic findings</p>  <p>Soure:CAE GmbH</p>                                                                                         |                                                                                                                                                                                                                                                                                                         |

| ☑      | Scanning guide                                                                                                                                                                                                                           | Tip for the examiners                                                                                                                                                                                                                                                                                                            |
|--------|------------------------------------------------------------------------------------------------------------------------------------------------------------------------------------------------------------------------------------------|----------------------------------------------------------------------------------------------------------------------------------------------------------------------------------------------------------------------------------------------------------------------------------------------------------------------------------|
| ☐ TN 1 | <p>Carry out a complete examination according to the FATE protocol. Pay attention to the correct order of the scanning planes, the position of the transducer and image optimization (1)</p> <p>Describe the pathologic findings (2)</p> | <p><b>Pathology: recent anterior myocardial infarction with pericardial effusion</b></p> <p>2. Explain the pathologic findings</p> 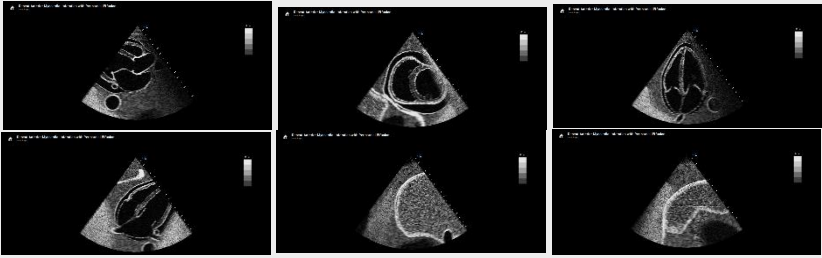 <p>Source:CAE GmbH</p>                                                                                     |
| ☐ TN 2 | <p>Carry out a complete examination according to the FATE protocol. Pay attention to the correct order of the scanning planes, the position of the transducer and image optimization (1)</p> <p>Describe the pathologic findings (2)</p> | <p><b>Pathology: pulmonary hypertension</b></p> <p>2. Explain the pathologic findings (Description of the D-Sign in right ventricular strain, the interventricular septum is pressed towards the left ventricle)</p>  <p>Source:CAE GmbH</p>   |
| ☐ TN 3 | <p>Carry out a complete examination according to the FATE protocol. Pay attention to the correct order of the scanning planes, the position of the transducer and image optimization (1)</p> <p>Describe the pathologic findings (2)</p> | <p><b>Pathology: acute lateral myocardial infarction</b></p> <p>1. Explain the pathologic findings (the wall does not move)</p>  <p>Source:CAE GmbH</p>  |
| ☐ TN 4 | <p>Carry out a complete examination according to the FATE protocol. Pay attention to the correct order of the scanning planes, the position of the transducer and image optimization (1)</p> <p>Describe the pathologic findings (2)</p> | <p><b>Pathology: dilatated cardiomyopathy – very severe left ventricular systolic dysfunction</b></p> <p>(Attention: If one lung is collapsed, you get the impression that there is a pleural effusion)</p>  <p>Source:CAE GmbH</p>          |
