# Supplementary material for: Simulator training in focus assessed transthoracic echocardiography (FATE) for undergraduate medical students: results from the FateSim randomized controlled trial
Source: PubMed Central journal article supplement (PMC11699650; doi:10.1186/s12909-024-06564-y), 2025-01-04
Supplement: 12909_2024_6564_MOESM5_ESM.pdf [file 12909_2024_6564_MOESM5_ESM.pdf]

### Question 1

· Complete the following sentence: The correct name for "dark" areas on an ultrasound image is:

\_\_\_\_\_

· Complete the following sentence: The correct name for "bright" areas on an ultrasound image is:

\_\_\_\_\_

### Question 2

Which transducer is shown here?

**Transducer:**

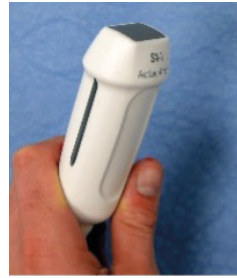

### Question 3

Which sectional scan planes are shown here? Label them on the images:

1. Sectional scan plane:
2. Sectional scan plane:
3. Sectional scan plane:

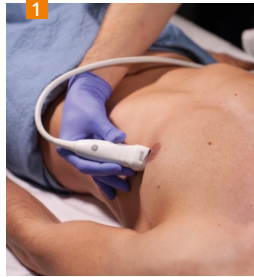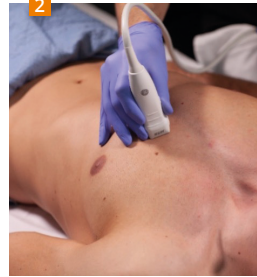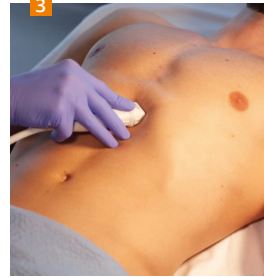

### Question 4

Which ultrasound image results from the scanning approach seen here?

- 1:     2:     3:     4:     5:

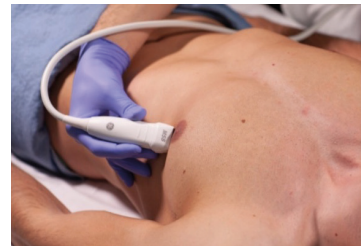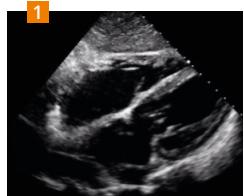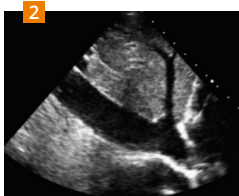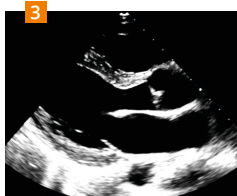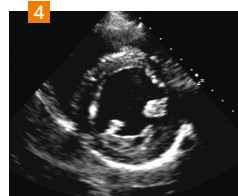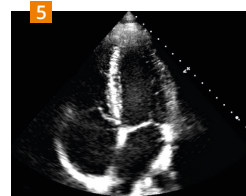

### Question 5

Which image on the ultrasound simulator results from the scanning approach seen here?

- 1:     2:     3:     4:     5:

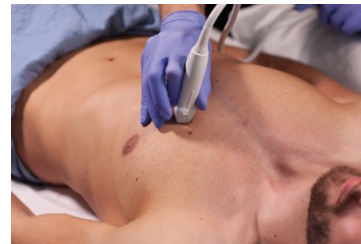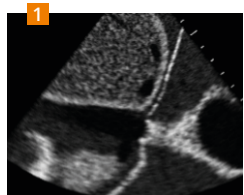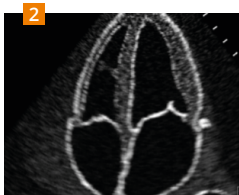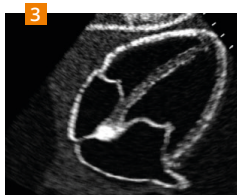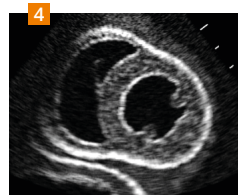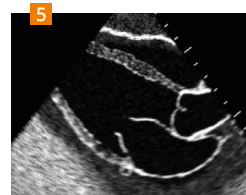

### Question 6

Through which scanning approach is the ultrasound image, seen here, obtained?

- 1:  2:  3:  4:  5:

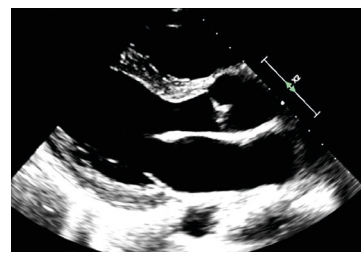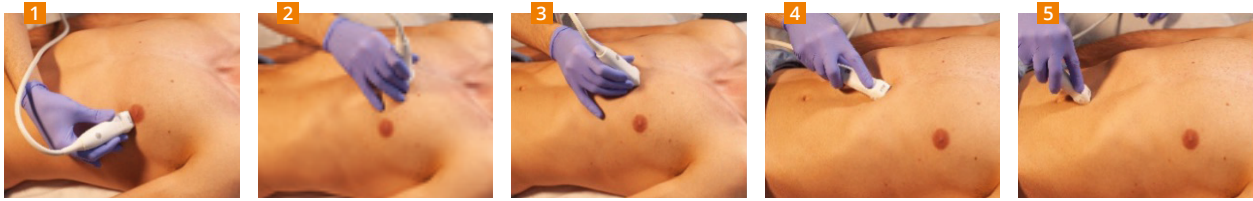

### Question 7

Through which scanning approach is the image on the ultrasound simulator, seen here, obtained?

- 1:  2:  3:  4:  5:

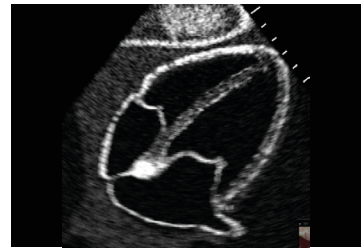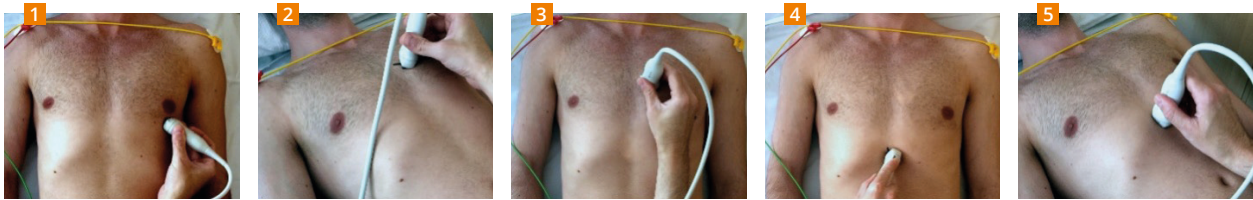

### Question 8

Which structures are marked on the image? Describe exactly.

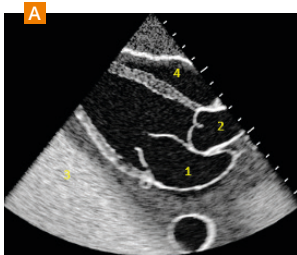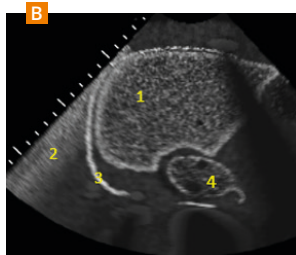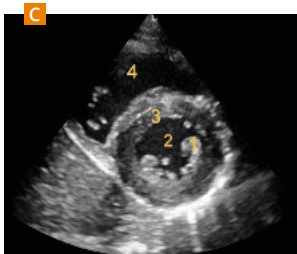

- A1:            A2:  
A3:            A4:  
  
B1:            B2:  
B3:            B4:  
  
C1:            C2:  
C3:            C4:

### Question 9

Which pathologies are marked on the image? Describe exactly.

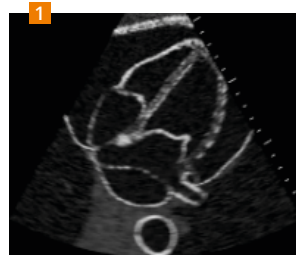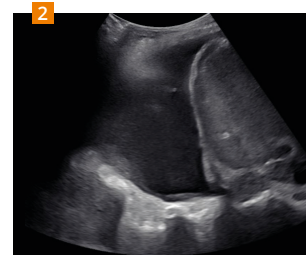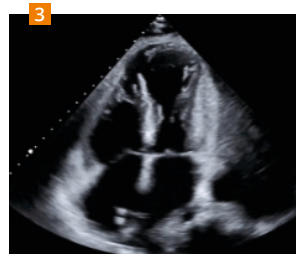

1. Pathology:  
2. Pathology:  
3. Pathology:
