# Supplementary material for: Simulator training in focus assessed transthoracic echocardiography (FATE) for undergraduate medical students: results from the FateSim randomized controlled trial
Source: PubMed Central journal article supplement (PMC11699650; doi:10.1186/s12909-024-06564-y), 2025-01-04
Supplement: 12909_2024_6564_MOESM7_ESM.pdf [file 12909_2024_6564_MOESM7_ESM.pdf]

## DOPS Evaluation form: Detection of pathologic findings on the simulator

|           |
|-----------|
| Code:     |
| Examiner: |

### 1) Pathology: *dilated cardiomyopathy – very severe left ventricular systolic dysfunction*

Task: Correctly obtain the **apical 4-chamber view** and, if necessary, the **parasternal long axis view** of the heart. Explain the ultrasound findings.

#### Demonstration of the scan planes

|                                                                         |                                   |
|-------------------------------------------------------------------------|-----------------------------------|
| ▪ The scan plane is demonstrated correctly/ adjusted without assistance | <b>2</b> <input type="checkbox"/> |
| ▪ The scan plane is corrected upon request                              | <b>1</b> <input type="checkbox"/> |
| ▪ Orientation only achieved with assistance                             | <b>0</b> <input type="checkbox"/> |

#### Detection of pathologic findings

|                                                                                                                                                              |                                   |
|--------------------------------------------------------------------------------------------------------------------------------------------------------------|-----------------------------------|
| ▪ The pathologic findings can be recognized/ described and reported independently                                                                            | <b>2</b> <input type="checkbox"/> |
| ▪ The pathologic findings can be recognized after demonstration/ can be described and reported<br>▪ <b>Tip for the examiner: Refer to the heart function</b> | <b>1</b> <input type="checkbox"/> |
| ▪ The pathologic findings cannot be recognized or correctly reported                                                                                         | <b>0</b> <input type="checkbox"/> |

#### **The entire examination process is rated with (1 to 8 points)**

*(Orientation, Positioning of the transducer, Coupling, Image optimization, Breathing command, Positioning of the patient, Time to perform the scan and Overall performance)*

1 – 2 – 3 – 4 – 5 – 6 – 7 – 8 \_\_\_\_\_ /8

**Total points** \_\_\_\_\_ /12

### 2) Pathology: *Pulmonary hypertension*

Task: Correctly obtain the **parasternal short axis view of the heart at the level of the papillary muscles** and, if necessary, the **apical 4-chamber view**. Explain the ultrasound findings.

#### Demonstration of the scan planes

|                                                                         |                                   |
|-------------------------------------------------------------------------|-----------------------------------|
| ▪ The scan plane is demonstrated correctly/ adjusted without assistance | <b>2</b> <input type="checkbox"/> |
| ▪ The scan plane is corrected upon request                              | <b>1</b> <input type="checkbox"/> |
| ▪ Orientation only with assistance possible                             | <b>0</b> <input type="checkbox"/> |

#### Detection of pathologic findings

|                                                                                                                                                               |                                   |
|---------------------------------------------------------------------------------------------------------------------------------------------------------------|-----------------------------------|
| ▪ The pathologic findings can be recognized/ described and reported independently                                                                             | <b>2</b> <input type="checkbox"/> |
| ▪ The pathologic findings can be recognized after demonstration/ can be described and reported<br>▪ <b>Tip for the examiner: Refer to the right ventricle</b> | <b>1</b> <input type="checkbox"/> |
| ▪ The pathologic findings cannot be recognized or correctly reported                                                                                          | <b>0</b> <input type="checkbox"/> |

#### **The entire examination process is rated with (1 to 8 points)**

*(Orientation, Positioning of the transducer, Coupling, Image optimization, Breathing command, Positioning of the patient, Time to perform the scan and Overall performance)*

1 – 2 – 3 – 4 – 5 – 6 – 7 – 8 \_\_\_\_\_ /8

**Total points** \_\_\_\_\_ /12

### 3) Pathology: Cardiac tamponade

Task: Correctly obtain the **subxiphoid 4-chamber view of the heart**, and, if necessary, the **parasternal short axis view at the level of the papillary muscles**. Explain the ultrasound findings.

#### Demonstration of the scan planes

|                                                                         |                            |
|-------------------------------------------------------------------------|----------------------------|
| ▪ The scan plane is demonstrated correctly/ adjusted without assistance | 2 <input type="checkbox"/> |
| ▪ The scan plane is corrected upon request                              | 1 <input type="checkbox"/> |
| ▪ Correct orientation only with assistance                              | 0 <input type="checkbox"/> |

#### Detection of pathologic findings

|                                                                                                                                                                         |                            |
|-------------------------------------------------------------------------------------------------------------------------------------------------------------------------|----------------------------|
| ▪ The pathologic findings can be recognized/ described and reported independently                                                                                       | 2 <input type="checkbox"/> |
| ▪ The pathologic findings can be recognized after demonstration/ can be described and reported<br><b>Hint for the examiner: Refer to the area surrounding the heart</b> | 1 <input type="checkbox"/> |
| ▪ The pathologic findings cannot be recognized or correctly reported                                                                                                    | 0 <input type="checkbox"/> |

The entire examination process is rated with (1 to 8 points)

(Orientation, positioning of the transducer, coupling, image optimization, breathing command, positioning of the patient, time to perform the scan and overall performance)

1 – 2 – 3 – 4 – 5 – 6 – 7 – 8 \_\_\_\_\_/8

Total points \_\_\_\_\_/12

### 4) Pathologie: Left pleural effusion case 09

Task: Correctly obtain the **left**, and if necessary, the **right lateral flank view**. Explain the ultrasound findings.

#### Demonstration of the scan planes

|                                                                         |                            |
|-------------------------------------------------------------------------|----------------------------|
| ▪ The scan plane is demonstrated correctly/ adjusted without assistance | 2 <input type="checkbox"/> |
| ▪ The scan plane is corrected upon request                              | 1 <input type="checkbox"/> |
| ▪ Orientation only with assistance possible                             | 0 <input type="checkbox"/> |

#### Detection of pathologic findings

|                                                                                                                                                                              |                            |
|------------------------------------------------------------------------------------------------------------------------------------------------------------------------------|----------------------------|
| ▪ The pathologic findings can be recognized/ described and reported independently                                                                                            | 2 <input type="checkbox"/> |
| ▪ The pathologic findings can be recognized after demonstration/ can be described and reported<br><b>Hint for the examiner: Refer to the area cranially to the diaphragm</b> | 1 <input type="checkbox"/> |
| ▪ The pathologic findings cannot be recognized or correctly reported                                                                                                         | 0 <input type="checkbox"/> |

The entire examination process is rated with (1 to 8 points)

(Orientation, positioning of the transducer, coupling, image optimization, breathing command, positioning of the patient, time to perform the scan and overall performance)

1 – 2 – 3 – 4 – 5 – 6 – 7 – 8 \_\_\_\_\_/8

Total points \_\_\_\_\_/12

Examiner's notes:

**Total points for detection of pathologic findings \_\_\_\_\_/48**
