# Supplementary material for: Simulator training in focus assessed transthoracic echocardiography (FATE) for undergraduate medical students: results from the FateSim randomized controlled trial
Source: PubMed Central journal article supplement (PMC11699650; doi:10.1186/s12909-024-06564-y), 2025-01-04

## Flow Diagram according to CONSORT

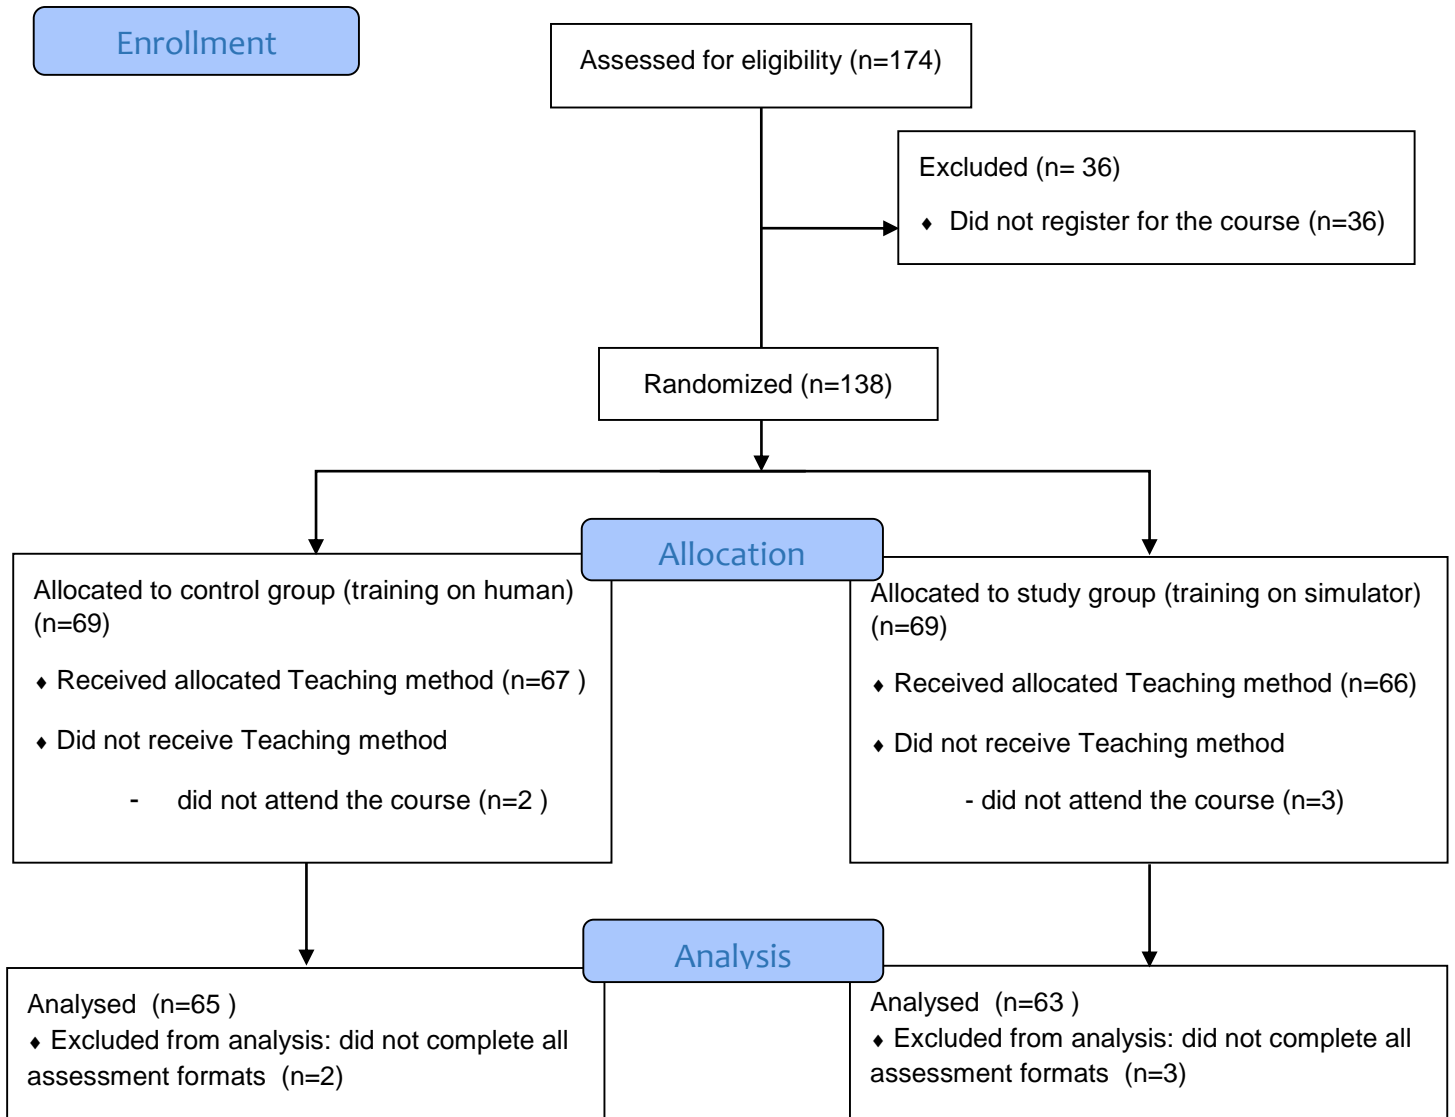

Supplement: 12909_2024_6564_MOESM8_ESM.pdf [file 12909_2024_6564_MOESM8_ESM.pdf]
