# Supplementary material for: Simulator training in focus assessed transthoracic echocardiography (FATE) for undergraduate medical students: results from the FateSim randomized controlled trial
Source: PubMed Central journal article supplement (PMC11699650; doi:10.1186/s12909-024-06564-y), 2025-01-04
Supplement: 12909_2024_6564_MOESM9_ESM.pdf [file 12909_2024_6564_MOESM9_ESM.pdf]

## Supplement 9 Motivation and Learning Objectives

|                                                                                    | T1 study group pre (Mean±SD) | T1 control group pre (Mean±SD) | P value | T2 Study group post (Mean±SD) | T2 control group post (Mean±SD) | P value | Delta study group (p-Value by time) | Delta control group (p-Value by time) | Delta P-value |
|------------------------------------------------------------------------------------|------------------------------|--------------------------------|---------|-------------------------------|---------------------------------|---------|-------------------------------------|---------------------------------------|---------------|
| <b>Motivation to attend FATE</b><br><i>1=highly motivated - 7=not motivated</i>    | 1.6 ± 0.8                    | 1.6 ± 1.0                      | 0.7     | 1.4 ± 0.6                     | 1.6 ± 1.0                       | 0.26    | 0.2 ± 0.9<br>(0.12)                 | 0.1 ± 1.0<br>(0.63)                   | 0.61          |
| <b>Overall: learning objectives achieved</b><br><i>1=completely - 7=not at all</i> | 1.3 ± 0.5                    | 1.2 ± 0.3                      | 0.06    | 1.7 ± 0.7                     | 1.7 ± 0.8                       | 0.77    | -0.3 ± 0.7<br>(0.003)               | -0.5 ± 0.8<br>( $< 0.001$ )           | 0.16          |
| Improvement technical skills                                                       | 1.4 ± 0.7                    | 1.3 ± 0.8                      | 0.39    | 1.8 ± 1.1                     | 1.6 ± 1.0                       | 0.31    | -0.4 ± 1.0<br>(0.02)                | -0.3 ± 1.2<br>(0.03)                  | 0.8           |
| Sono-anatomy                                                                       | 1.3 ± 0.6                    | 1.2 ± 0.4                      | 0.28    | 1.5 ± 0.7                     | 1.6 ± 1.0                       | 0.85    | -0.3 ± 0.7<br>(0.02)                | -0.4 ± 1.0<br>(0.002)                 | 0.34          |
| Practical ultrasound skills                                                        | 1.1 ± 0.5                    | 1.1 ± 0.2                      | 0.26    | 1.6 ± 1.0                     | 1.4 ± 0.7                       | 0.29    | -0.4 ± 1.0<br>(0.002)               | -0.4 ± 0.7<br>( $< 0.001$ )           | 0.65          |
| Ability to perform a standardized exam                                             | 1.3 ± 0.7                    | 1.2 ± 0.4                      | 0.14    | 1.4 ± 0.7                     | 1.5 ± 0.9                       | 0.57    | -0.1 ± 0.7<br>(0.43)                | -0.3 ± 0.9<br>(0.01)                  | 0.15          |
| Assess pathological findings                                                       | 1.5 ± 0.9                    | 1.3 ± 0.7                      | 0.06    | 1.9 ± 1.0                     | 2.2 ± 1.3                       | 0.06    | -0.3 ± 1.1<br>(0.06)                | -1.0 ± 1.4<br>( $< 0.001$ )           | 0.005         |
| Confidence in interpreting results                                                 | 1.3 ± 0.7                    | 1.1 ± 0.4                      | 0.07    | 1.8 ± 0.8                     | 1.8 ± 0.9                       | 0.62    | -0.5 ± 1.0<br>( $< 0.001$ )         | -0.7 ± 1.0<br>( $< 0.001$ )           | 0.11          |
