# Supplementary material for: Simulator training in focus assessed transthoracic echocardiography (FATE) for undergraduate medical students: results from the FateSim randomized controlled trial
Source: PubMed Central journal article supplement (PMC11699650; doi:10.1186/s12909-024-06564-y), 2025-01-04
Supplement: 12909_2024_6564_MOESM10_ESM.pdf [file 12909_2024_6564_MOESM10_ESM.pdf]

## Supplement 10 Evaluation of Course Concept and Training

|                                                                                                                | <b>Control Group</b><br>(Mean±SD) | <b>Study group</b><br>(Mean±SD) | <b>p-value</b> |
|----------------------------------------------------------------------------------------------------------------|-----------------------------------|---------------------------------|----------------|
| <b>Overall personal learning experience</b><br><i>1=very high - 7= very low</i>                                | 1.8 ± 0.7                         | 2.3 ± 0.9                       | < 0.001        |
| Acquisition of practical skills                                                                                | 1.8 ± 0.9                         | 2.0 ± 1.4                       | 0.34           |
| Fundamental theoretical knowledge                                                                              | 2.2 ± 1.1                         | 2.1 ± 0.9                       | 0.35           |
| Practical relevance                                                                                            | 1.5 ± 0.7                         | 1.7 ± 1.1                       | 0.16           |
| Realistic depiction of patient interaction                                                                     | 1.7 ± 1.0                         | 3.5 ± 1.6                       | < 0.001        |
| <b>Overall personal satisfaction with course and personal gain from it</b><br><i>1=very high - 7= very low</i> | 2.5 ± 0.6                         | 2.7 ± 0.7                       | 0.05           |
| Competence FATE protocol                                                                                       | 2.4 ± 1.0                         | 2.4 ± 1.1                       | 0.97           |
| Highly relevant for my degree/my job                                                                           | 1.4 ± 0.7                         | 1.6 ± 1.0                       | 0.09           |
| <b>Overall: Desire to use Simulators</b><br><i>1=very high - 7= very low</i>                                   | 3.2 ± 1.1                         | 3.1 ± 1.1                       | 0.49           |
| In addition to real patients                                                                                   | 1.7 ± 1.2                         | 1.6 ± 1.1                       | 0.38           |
| A complete replacement of real patients                                                                        | 5.4 ± 2.1                         | 5.0 ± 2.3                       | 0.37           |
| In addition to mandatory courses in med-school (clinic)                                                        | 2.4 ± 1.5                         | 2.1 ± 1.6                       | 0.35           |
| In addition to mandatory courses in med-school (pre-clinic)                                                    | 3.4 ± 2.0                         | 3.7 ± 1.9                       | 0.48           |
| <b>Overall Course Evaluation</b><br><i>1=very high - 7= very low</i>                                           | 2.4 ± 0.9                         | 2.2 ± 0.9                       | 0.09           |
| Course concept and structure                                                                                   | 2.2 ± 1.1                         | 2.0 ± 1.0                       | 0.23           |
| <b>Overall Evaluation of Tutors</b><br><i>1=very high - 7= very low</i>                                        | 1.7 ± 0.7                         | 1.4 ± 0.7                       | 0.03           |
