# Supplementary material for: Simulator training in focus assessed transthoracic echocardiography (FATE) for undergraduate medical students: results from the FateSim randomized controlled trial
Source: PubMed Central journal article supplement (PMC11699650; doi:10.1186/s12909-024-06564-y), 2025-01-04
Supplement: 12909_2024_6564_MOESM11_ESM.pdf [file 12909_2024_6564_MOESM11_ESM.pdf]

## Supplement 11 Subjective Competencies gain development

|                                                                    | T1 study group pre (Mean±SD) | T1 control group pre (Mean±SD) | P value   | T2 study group post (Mean±SD) | T2 control group post (Mean±SD) | P value   | Delta study group (p-Value by time) | Delta control group (p-Value by time) | Delta P-value |
|--------------------------------------------------------------------|------------------------------|--------------------------------|-----------|-------------------------------|---------------------------------|-----------|-------------------------------------|---------------------------------------|---------------|
| Overall self-assessment Echo<br><i>1= very high – 7 = very low</i> | 5.3 ± 1.1                    | 5.3 ± 1.2                      | 0.87      | 2.6 ± 0.7                     | 2.7 ± 0.7                       | 0.28      | 2.7 ± 1.2<br>( $< 0.001$ )          | 2.6 ± 1.2<br>( $< 0.001$ )            | 0.62          |
| Technical knowledge                                                | 5.2 ± 1.5                    | 5.3 ± 1.8                      | 0.77      | 2.5 ± 0.7                     | 2.6 ± 1.0                       | 0.42      | 2.7 ± 1.5<br>( $< 0.001$ )          | 2.6 ± 1.7<br>( $< 0.001$ )            | 0.9           |
| Machine handling                                                   | 5.3 ± 1.6                    | 5.2 ± 1.7                      | 0.81      | 2.7 ± 1.4                     | 2.7 ± 1.1                       | 0.9       | 2.6 ± 1.8<br>( $< 0.001$ )          | 2.5 ± 1.8<br>( $< 0.001$ )            | 0.76          |
| Transducer movement                                                | 4.6 ± 1.7                    | 4.7 ± 1.7                      | 0.65      | 2.4 ± 0.9                     | 2.4 ± 0.9                       | 0.86      | 2.1 ± 1.9<br>( $< 0.001$ )          | 2.3 ± 1.6<br>( $< 0.001$ )            | 0.59          |
| Spatial orientation                                                | 4.6 ± 1.5                    | 4.7 ± 1.6                      | 0.75      | 2.4 ± 1.0                     | 2.7 ± 1.0                       | 0.19      | 2.2 ± 1.7<br>( $< 0.001$ )          | 2.0 ± 1.5<br>( $< 0.001$ )            | 0.61          |
| Sono-anatomy                                                       | 4.8 ± 1.6                    | 4.7 ± 1.6                      | 0.85      | 2.2 ± 0.9                     | 2.3 ± 1.0                       | 0.59      | 2.6 ± 1.7<br>( $< 0.001$ )          | 2.4 ± 1.7<br>( $< 0.001$ )            | 0.64          |
| Visualization of organs                                            | 5.2 ± 1.6                    | 5.4 ± 1.6                      | 0.48      | 2.4 ± 1.1                     | 2.3 ± 0.8                       | 0.47      | 2.8 ± 1.7<br>( $< 0.001$ )          | 3.1 ± 1.5<br>( $< 0.001$ )            | 0.27          |
| Organ-soecific examination                                         | 5.6 ± 1.5                    | 5.6 ± 1.5                      | 0.82      | 2.6 ± 1.0                     | 2.5 ± 0.9                       | 0.45      | 3.0 ± 1.7<br>( $< 0.001$ )          | 3.1 ± 1.7<br>( $< 0.001$ )            | 0.52          |
| Recognizing pathologies                                            | 6.2 ± 0.9                    | 6.0 ± 1.2                      | $< 0.001$ | 2.7 ± 1.0                     | 3.1 ± 1.2                       | $< 0.001$ | 3.7 ± 1.2<br>( $< 0.001$ )          | 2.8 ± 1.6<br>( $< 0.001$ )            | $< 0.001$     |
| Differential diagnoses                                             | 6.2 ± 1.1                    | 6.2 ± 1.1                      | 0.97      | 3.1 ± 1.3                     | 3.7 ± 1.4                       | 0.02      | 3.1 ± 1.5<br>( $< 0.001$ )          | 2.5 ± 1.7<br>( $< 0.001$ )            | 0.04          |
