# Supplementary material for: Simulator training in focus assessed transthoracic echocardiography (FATE) for undergraduate medical students: results from the FateSim randomized controlled trial
Source: PubMed Central journal article supplement (PMC11699650; doi:10.1186/s12909-024-06564-y), 2025-01-04
Supplement: 12909_2024_6564_MOESM12_ESM.pdf [file 12909_2024_6564_MOESM12_ESM.pdf]

## Supplement 12 Results of Theory-Test

|                                                                                                | T1<br>study<br>group pre<br>(Mean±SD) | T1<br>Control<br>group pre<br>(Mean±SD) | P<br>value | T2<br>study<br>group post<br>(Mean±SD) | T2<br>control<br>group post<br>(Mean±SD) | P<br>value | Delta<br>study<br>group<br>(p-Value<br>by time) | Delta<br>control<br>group<br>(p-Value<br>by time) | Delta<br>P-<br>value |
|------------------------------------------------------------------------------------------------|---------------------------------------|-----------------------------------------|------------|----------------------------------------|------------------------------------------|------------|-------------------------------------------------|---------------------------------------------------|----------------------|
| <b>Overall: fundamental theoretical knowledge and normal findings</b><br><i>max. 74 points</i> | 18.5 ± 9.5                            | 24.4 ± 15.7                             | 0.01       | 56.4 ± 6.6                             | 57.4 ± 7.5                               | 0.41       | 37.9 ± 9.2<br>( $< 0.001$ )                     | 33.0 ± 14.0<br>( $< 0.001$ )                      | 0.02                 |
| Score Fundamentals<br><i>max. 14 points</i>                                                    | 7.8 ± 3.1                             | 8.7 ± 4.7                               | 0.18       | 9.8 ± 2.7                              | 9.9 ± 3.3                                | 0.88       | 2.1 ± 3.1<br>( $< 0.001$ )                      | 1.2 ± 3.83<br>(0.09)                              | 0.17                 |
| Score Normal findings<br><i>max. 10 points</i>                                                 | 1.1 ± 1.1                             | 1.9 ± 2.4                               | 0.02       | 8.2 ± 1.8                              | 8.4 ± 1.6                                | 0.55       | 7.1 ± 1.8<br>( $< 0.001$ )                      | 6.6 ± 2.4<br>( $< 0.001$ )                        | 0.12                 |
| Score labeling of sectional image<br><i>max. 50 points</i>                                     | 9.7 ± 7.9                             | 13.8 ± 10.1                             | 0.01       | 38.3 ± 4.5                             | 39.1 ± 4.6                               | 0.35       | 28.7 ± 8.2<br>( $< 0.001$ )                     | 25.3 ± 10.0<br>( $< 0.001$ )                      | 0.04                 |
| Overall: Pathologies<br><i>max. 9 points, 1 control question</i>                               | x                                     | x                                       | x          | 4.7 ± 1.5                              | 4.3 ± 1.6                                | 0.16       | x                                               | x                                                 | x                    |
