# Supplementary material for: Simulator training in focus assessed transthoracic echocardiography (FATE) for undergraduate medical students: results from the FateSim randomized controlled trial
Source: PubMed Central journal article supplement (PMC11699650; doi:10.1186/s12909-024-06564-y), 2025-01-04
Supplement: 12909_2024_6564_MOESM13_ESM.pdf [file 12909_2024_6564_MOESM13_ESM.pdf]

## Supplement 13 Results of the practical examination

|                                                             | Simulator Exam (DOPS <sup>Sim</sup> ) |                       |         | Human Model Exam (DOPS <sup>Human</sup> ) |                       |         | Comparison of exam performance on the simulator vs. on human models |                     |
|-------------------------------------------------------------|---------------------------------------|-----------------------|---------|-------------------------------------------|-----------------------|---------|---------------------------------------------------------------------|---------------------|
|                                                             | Control group (Mean±SD)               | Study group (Mean±SD) | p-value | Control group (Mean±SD)                   | Study group (Mean±SD) | p-value | p-value control group                                               | p-value study group |
| FATE Overall score<br><i>max. 78 points</i>                 | 63.9 ± 8.1                            | 64.1 ± 7.0            | 0.89    | 63.9 ± 8.6                                | 59.4 ± 10.2           | 0.008   | 0.97                                                                | 0.003               |
| Patient guidance/<br>Communication ( <i>max. 8 points</i> ) | 6.7 ± 1.9                             | 6.8 ± 1.7             | 0.75    | 6.9 ± 1.3                                 | 6.6 ± 1.8             | 0.39    | 0.6                                                                 | 0.54                |
| FATE 1 ( <i>max. 8 points</i> )                             | 6.9 ± 1.6                             | 7.4 ± 1.2             | 0.04    | 6.3 ± 1.9                                 | 6.0 ± 2.2             | 0.39    | 0.04                                                                | < 0.001             |
| F1 Skills ( <i>max. 6 points</i> )                          | 5.0 ± 1.6                             | 5.4 ± 1.2             | 0.06    | 4.4 ± 1.7                                 | 4.1 ± 2.0             | 0.41    | 0.05                                                                | < 0.001             |
| F2 Show ( <i>max. 2 points</i> )                            | 2.0 ± 0.3                             | 2.0 ± 0.0             | 0.23    | 1.9 ± 0.4                                 | 1.9 ± 0.4             | 0.61    | 0.49                                                                | 0.03                |
| FATE 2 ( <i>max. 8 points</i> )                             | 6.6 ± 1.8                             | 6.7 ± 1.5             | 0.65    | 6.2 ± 1.8                                 | 5.6 ± 1.9             | 0.07    | 0.17                                                                | < 0.001             |
| F2 Skills                                                   | 4.6 ± 1.7                             | 4.8 ± 1.5             | 0.47    | 4.2 ± 1.8                                 | 3.6 ± 1.9             | 0.09    | 0.2                                                                 | < 0.001             |
| F2 Show                                                     | 2.0 ± 0.3                             | 2.0 ± 0.1             | 0.05    | 2.0 ± 0.1                                 | 2.0 ± 0.2             | 0.09    | 0.28                                                                | 1                   |
| FATE 3 ( <i>max. 8 points</i> )                             | 6.1 ± 1.7                             | 6.3 ± 1.7             | 0.62    | 7.0 ± 1.5                                 | 6.3 ± 2.0             | 0.02    | 0.003                                                               | 0.94                |
| F3 Skills                                                   | 4.2 ± 1.6                             | 4.4 ± 1.6             | 0.5     | 5.0 ± 1.4                                 | 4.3 ± 1.9             | 0.02    | 0.002                                                               | 0.92                |
| F3 Show                                                     | 1.9 ± 0.2                             | 1.9 ± 0.2             | 0.17    | 1.9 ± 0.2                                 | 1.9 ± 0.3             | 0.83    | 0.37                                                                | 0.88                |
| FATE 4 ( <i>max. 8 points</i> )                             | 6.3 ± 1.7                             | 6.3 ± 1.3             | 0.89    | 7.0 ± 1.4                                 | 6.6 ± 1.5             | 0.13    | 0.01                                                                | 0.19                |
| F4 Skills                                                   | 4.4 ± 1.5                             | 4.4 ± 1.2             | 0.84    | 5.0 ± 1.4                                 | 4.7 ± 1.4             | 0.16    | 0.02                                                                | 0.18                |
| F4 Show                                                     | 1.9 ± 0.4                             | 1.9 ± 0.2             | 0.82    | 1.9 ± 0.2                                 | 1.9 ± 0.3             | 0.36    | 0.23                                                                | 0.87                |
| FATE 5 ( <i>max. 8 points</i> )                             | 7.6 ± 1.2                             | 7.6 ± 0.9             | 0.92    | 7.5 ± 1.3                                 | 7.2 ± 1.5             | 0.2     | 0.78                                                                | 0.07                |

|                                                                |                                                 |            |      |            |            |        |      |         |
|----------------------------------------------------------------|-------------------------------------------------|------------|------|------------|------------|--------|------|---------|
| F5 Skills                                                      | 5.7 ± 1.1                                       | 5.7 ± 0.9  | 0.77 | 5.6 ± 1.2  | 5.3 ± 1.4  | 0.2    | 0.76 | 0.05    |
| F5 Show                                                        | 1.9 ± 0.2                                       | 1.9 ± 0.2  | 0.43 | 1.9 ± 0.2  | 1.9 ± 0.2  | 0.52   | 1    | 0.85    |
| FATE 6 ( <i>max. 8 points</i> )                                | 7.6 ± 1.1                                       | 7.7 ± 0.8  | 0.7  | 7.3 ± 1.3  | 7.1 ± 1.6  | 0.43   | 0.14 | 0.01    |
| F6 Skills                                                      | 5.7 ± 1.1                                       | 5.8 ± 0.8  | 0.62 | 5.4 ± 1.3  | 5.2 ± 1.4  | 0.63   | 0.12 | 0.01    |
| F6 Show                                                        | 1.9 ± 0.2                                       | 1.9 ± 0.2  | 0.65 | 1.9 ± 0.2  | 1.8 ± 0.4  | 0.15   | 0.69 | 0.38    |
| FATE Skills (F1-F6) ( <i>max. 36 points</i> )                  | 29.5 ± 5.1                                      | 30.5 ± 3.6 | 0.22 | 29.6 ± 4.5 | 27.3 ± 6.2 | 0.02   | 0.91 | < 0.001 |
| FATE Show (F1-F6) ( <i>max. 12 points</i> )                    | 11.7 ± 0.8                                      | 11.5 ± 0.8 | 0.36 | 11.6 ± 0.8 | 11.4 ± 0.9 | 0.1    | 0.82 | 0.36    |
| Handling ( <i>max. 14 points</i> )                             | 10.0 ± 2.3                                      | 9.5 ± 2.5  | 0.21 | 9.8 ± 2.8  | 8.6 ± 2.5  | 0.009  | 0.65 | 0.05    |
| Orientation                                                    | 1.6 ± 0.5                                       | 1.4 ± 0.5  | 0.01 | 1.4 ± 0.6  | 1.1 ± 0.6  | 0.02   | 0.03 | 0.02    |
| Positioning                                                    | 1.4 ± 0.6                                       | 1.4 ± 0.6  | 0.69 | 1.3 ± 0.6  | 1.0 ± 0.6  | 0.0004 | 0.76 | < 0.001 |
| Transducer movement and manipulation                           | 1.5 ± 0.5                                       | 1.4 ± 0.5  | 0.49 | 1.5 ± 0.5  | 1.4 ± 0.5  | 0.04   | 0.60 | 0.43    |
| “Knobology” and settings (adequate depth, gain, focus and TCG) | 1.2 ± 0.5                                       | 1.3 ± 0.5  | 0.38 | 1.4 ± 0.6  | 1.3 ± 0.5  | 0.31   | 0.14 | 0.71    |
| Instruction of patient incl. breathing                         | 1.4 ± 0.6                                       | 1.3 ± 0.8  | 0.5  | 1.4 ± 0.6  | 1.4 ± 0.6  | 0.75   | 1    | 0.7     |
| Positioning of Patient                                         | 1.4 ± 0.7                                       | 1.2 ± 0.7  | 0.2  | 1.5 ± 0.5  | 1.3 ± 0.6  | 0.05   | 0.25 | 0.42    |
| Speed of examination                                           | 1.6 ± 0.6                                       | 1.5 ± 0.6  | 0.31 | 1.3 ± 0.6  | 1.3 ± 0.7  | 0.53   | 0.01 | 0.06    |
| Overall impression ( <i>max. 8 points</i> )                    | 3.0 ± 1.0                                       | 3.2 ± 1.0  | 0.21 | 3.1 ± 1.4  | 3.6 ± 1.5  | 0.07   | 0.73 | 0.16    |
|                                                                | <b>Simulator Exam (DOPS<sup>SimPatho</sup>)</b> |            |      |            |            |        |      |         |
| <b>FATE Patho Overall</b><br><i>max. 48 points</i>             | 36.4 ± 5.0                                      | 37.4 ± 4.6 | 0.23 | x          | x          | x      |      |         |
| Patho 1 ( <i>max. 12 points</i> )                              | 8.8 ± 2.0                                       | 8.5 ± 1.7  | 0.49 | x          | x          | x      |      |         |

|                                      |           |            |      |   |   |   |  |  |
|--------------------------------------|-----------|------------|------|---|---|---|--|--|
| P1 Skill ( <i>max. 2 points</i> )    | 1.7 ± 0.6 | 1.5 ± 0.6  | 0.06 | x | x | x |  |  |
| P1 Recog ( <i>max. 2 points</i> )    | 1.4 ± 0.7 | 1.5 ± 0.6  | 0.32 | x | x | x |  |  |
| P1 Impress. ( <i>max. 8 points</i> ) | 3.3 ± 1.3 | 3.4 ± 1.2  | 0.53 | x | x | x |  |  |
| Patho 2 ( <i>max. 12 points</i> )    | 8.3 ± 1.6 | 8.8 ± 1.8  | 0.08 | x | x | x |  |  |
| P2 Skill                             | 1.4 ± 0.6 | 1.5 ± 0.6  | 0.09 | x | x | x |  |  |
| P2 Recog                             | 1.4 ± 0.7 | 1.7 ± 0.5  | 0.01 | x | x | x |  |  |
| P2 Impress                           | 3.4 ± 1.2 | 3.4 ± 1.2  | 0.71 | x | x | x |  |  |
| Patho 3 ( <i>max. 12 points</i> )    | 9.6 ± 1.6 | 9.9 ± 1.6  | 0.41 | x | x | x |  |  |
| P3 Skill                             | 1.8 ± 0.4 | 1.8 ± 0.4  | 0.32 | x | x | x |  |  |
| P3 Recog                             | 1.8 ± 0.4 | 1.8 ± 0.5  | 0.64 | x | x | x |  |  |
| P3 Impress                           | 2.9 ± 1.1 | 2.7 ± 1.1  | 0.32 | x | x | x |  |  |
| Patho 4( <i>max. 12 points</i> )     | 9.7 ± 1.3 | 10.2 ± 1.4 | 0.04 | x | x | x |  |  |
| P4 Skill                             | 1.8 ± 0.5 | 1.8 ± 0.4  | 0.24 | x | x | x |  |  |
| P4 Recog                             | 1.9 ± 0.3 | 1.9 ± 0.3  | 0.45 | x | x | x |  |  |
| P4 Impress                           | 2.9 ± 1.0 | 2.6 ± 1.0  | 0.04 | x | x | x |  |  |
| Skills Patho 1-4 Overall             | 6.5 ± 1.3 | 6.7 ± 1.1  | 0.5  | x | x | x |  |  |
| Recog Patho 1-4 Overall              | 6.4 ± 1.2 | 6.8 ± 1.2  | 0.08 | x | x | X |  |  |
